# Supplementary material
Source: PubMed Central journal article supplement (PMC1899421)

## Supplemental Figure 1

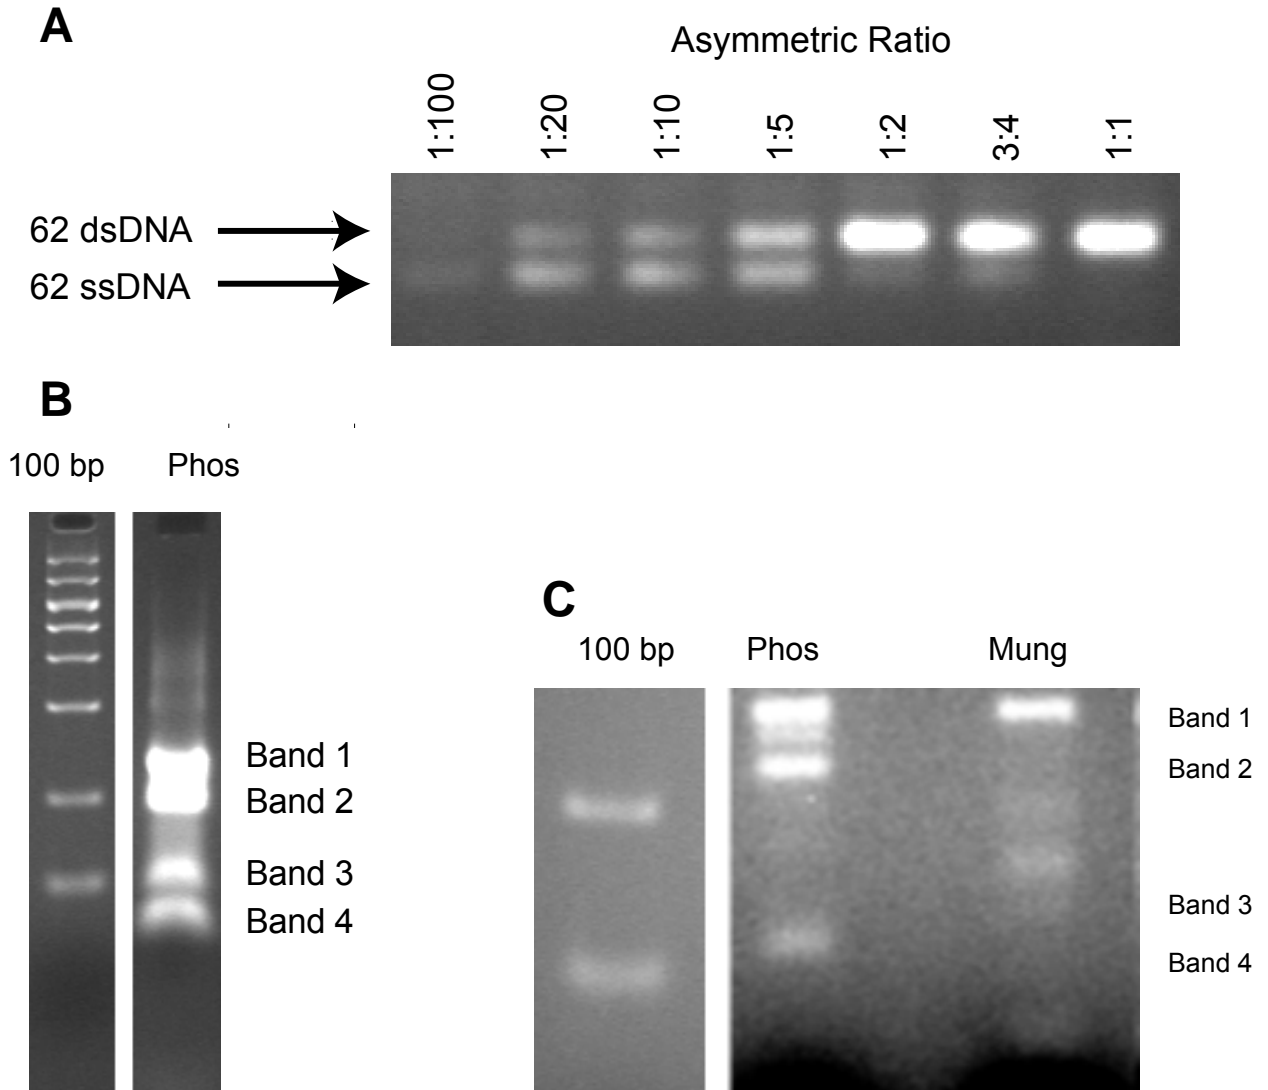

Supplement: jmd_9_3_290__1.pdf [file jmd_9_3_290__1.pdf]
